# Supplementary material
Source: publisher site journal article supplement (https://www.spandidos-publications.com/2063/downloadSupplementary)
Supplement: Supplementary file 1 [file downloadSupplementary]

## Sheet: Sheet1
Table SI. Exosomal markers from the ExoCarta database.
Serial no.	Gene symbol	No. of times identified
1	CD9	98
2	HSPA8	97
3	PDCD6IP	96
4	GAPDH	95
5	ACTB	93
6	ANXA2	83
7	CD63	82
8	SDCBP	78
9	ENO1	78
10	HSP90AA1	77
11	TSG101	76
12	PKM	72
13	LDHA	72
14	EEF1A1	71
15	YWHAZ	69
16	PGK1	69
17	EEF2	69
18	ALDOA	69
19	HSP90AB1	67
20	ANXA5	67
21	FASN	66
22	YWHAE	65
23	CLTC	64
24	CD81	64
25	ALB	64
26	VCP	62
27	TPI1	62
28	PPIA	62
29	MSN	62
30	CFL1	62
31	PRDX1	61
32	PFN1	61
33	RAP1B	60
34	ITGB1	60
35	HSPA5	58
36	SLC3A2	57
37	HIST1H4A	57
38	GNB2	57
39	ATP1A1	57
40	YWHAQ	56
41	FLOT1	56
42	FLNA	56
43	CLIC1	56
44	CDC42	56
45	CCT2	56
46	A2M	55
47	YWHAG	54
48	TUBA1B	53
49	RAC1	53
50	LGALS3BP	53
51	HSPA1A	53
52	GNAI2	53
53	ANXA1	53
54	RHOA	52
55	MFGE8	52
56	PRDX2	51
57	GDI2	51
58	EHD4	51
59	ACTN4	51
60	YWHAB	50
61	RAB7A	50
62	LDHB	50
63	GNAS	50
64	TFRC	49
65	RAB5C	49
66	ARF1	49
67	ANXA6	49
68	ANXA11	49
69	ACTG1	49
70	KPNB1	48
71	EZR	48
72	ANXA4	48
73	ACLY	48
74	TUBA1C	47
75	RAB14	47
76	HIST2H4A	47
77	GNB1	47
78	UBA1	46
79	THBS1	46
80	RAN	46
81	RAB5A	46
82	PTGFRN	46
83	CCT5	46
84	CCT3	46
85	BSG	46
86	AHCY	46
87	RAB5B	45
88	RAB1A	45
89	LAMP2	45
90	ITGA6	45
91	HIST1H4B	45
92	GSN	45
93	FN1	45
94	YWHAH	44
95	TUBA1A	44
96	TKT	44
97	TCP1	44
98	STOM	44
99	SLC16A1	44
100	RAB8A	44
